# Supplementary material
Source: PubMed Central journal article supplement (PMC3592167)
Supplement: JVI.02906-12_zjv999097393so1.pdf [file JVI.02906-12_zjv999097393so1.pdf]

## **Supplemental Material**

**Movie 1: Lateral surface movement of HPV16-bound CD151.** TIRF movie of HeLa cells transfected with CFP-CD151 and infected with Alexa Fluor-488 labelled HPV16 pseudovirions for 2.5 h shows lateral movement of HPV16-bound CD151 and CD151.

**Movie 2: Co-internalization of HPV16-bound CD151.** TIRF movie of HeLa cells transfected with CFP-CD151 and infected with Alexa Fluor-488 labelled HPV16 pseudovirions for 2.5 h shows co-internalization of HPV16 and CD151.
